# Supplementary material for: Demography's Changing Intellectual Landscape: A Bibliometric Analysis of the Leading Anglophone Journals, 1950–2020
Source: Oxford University Press journal article supplement (doi:10.1215/00703370-10714127), 2023-05-11
Supplement: merli_esm.pdf [file merli_esm.pdf]

**Online Supplement**  
**Demography's Changing Intellectual Landscape: A Bibliometric Analysis of the Leading Anglophone Journals, 1950-2020**

M. Giovanna Merli, James Moody, Ashton Verdery, Mark Yacoub

Table S1. Counts of references cited by papers in *Demography*, *Population Studies* and *Population and Development Review*, by Web of Science subject category

| <b>Rank</b> | <b>Web of Science Subject Category</b>      | <b>Count of References</b> |
|-------------|---------------------------------------------|----------------------------|
| 1           | Demography                                  | 34,647                     |
| 2           | Sociology                                   | 25,113                     |
| 3           | Economics                                   | 15,034                     |
| 4           | Public, Environmental & Occupational Health | 7,241                      |
| 5           | Family Studies                              | 5,874                      |
| 6           | Public Environment, Health                  | 3,265                      |
| 7           | Medicine, General & Internal                | 3,132                      |
| 8           | Multidisciplinary Sciences                  | 2,831                      |
| 9           | Social Sciences, Mathematical Methods       | 2,219                      |
| 10          | Statistics & Probability                    | 2,161                      |
| 11          | Planning Development                        | 1,891                      |
| 12          | Industrial Relations                        | 1,857                      |
| 13          | Anthropology                                | 1,730                      |
| 14          | Political Science                           | 1,665                      |
| 15          | Gerontology                                 | 1,625                      |
| 16          | Social Science, Interdisciplinary           | 1,604                      |
| 17          | History                                     | 1,378                      |
| 18          | Psychology, Social                          | 1,324                      |
| 19          | Area Studies                                | 1,215                      |
| 20          | Geography                                   | 1,179                      |
| 21          | History, Social Science                     | 1,174                      |
| 22          | Environmental Studies                       | 1,130                      |
| 23          | Obstetrics & Gynecology                     | 1,114                      |
| 24          | Psychology, Multidisciplinary               | 1,041                      |

Table S2: Coefficients estimated from logit models of citation patterns, 1947-2020

| Parameter                 | a) Economics References |                |                | b) Sociology References |                |                |
|---------------------------|-------------------------|----------------|----------------|-------------------------|----------------|----------------|
|                           | <i>Estimate</i>         | <i>Std Err</i> | <i>P-value</i> | <i>Estimate</i>         | <i>Std Err</i> | <i>P-value</i> |
| Intercept                 | 8.37                    | 4.81           | 0.0820         | 10.39                   | 4.17           | 0.0127         |
| year                      | 0.00                    | 0.00           | 0.0699         | -0.01                   | 0.00           | 0.0062         |
| Abortion                  | -1.11                   | 0.38           | 0.0032         | -0.80                   | 0.26           | 0.0024         |
| Africa                    | -0.47                   | 0.22           | 0.0372         | -0.38                   | 0.20           | 0.0531         |
| Birth Intervals           | 0.02                    | 0.22           | 0.9225         | -0.84                   | 0.27           | 0.0018         |
| Birth Spacing             | -1.08                   | 0.47           | 0.0209         | -1.22                   | 0.37           | 0.0009         |
| Child Mortality           | -0.26                   | 0.19           | 0.1627         | -0.95                   | 0.25           | 0.0001         |
| Child Well-being          | -0.14                   | 0.10           | 0.1495         | -0.34                   | 0.11           | 0.0019         |
| China                     | -0.72                   | 0.29           | 0.0122         | 0.39                    | 0.13           | 0.0037         |
| Dem Tech                  | -0.65                   | 0.16           | <.0001         | -0.87                   | 0.14           | <.0001         |
| Dem Transition            | -0.12                   | 0.11           | 0.2556         | -0.11                   | 0.10           | 0.244          |
| Divorce                   | -1.06                   | 0.20           | <.0001         | 0.47                    | 0.10           | <.0001         |
| Education                 | -0.13                   | 0.11           | 0.2558         | 0.16                    | 0.11           | 0.1541         |
| Family Planning           | -0.58                   | 0.16           | 0.0003         | -0.62                   | 0.13           | <.0001         |
| Fecundability             | -1.92                   | 1.02           | 0.0610         | -2.75                   | 1.22           | 0.0241         |
| HH & Living Arrang.       | -0.57                   | 0.15           | <.0001         | 0.11                    | 0.11           | 0.3005         |
| HIV/AIDS                  | -1.62                   | 0.32           | <.0001         | -1.17                   | 0.25           | <.0001         |
| Health & Aging            | -0.90                   | 0.14           | <.0001         | -1.23                   | 0.19           | <.0001         |
| Income & Poverty          | 0.57                    | 0.10           | <.0001         | -0.63                   | 0.15           | <.0001         |
| Infant Mortality          | -0.84                   | 0.20           | <.0001         | -0.80                   | 0.18           | <.0001         |
| Life Exp & Longevity      | -0.95                   | 0.14           | <.0001         | -1.05                   | 0.14           | <.0001         |
| Marriage & Cohabitation   | -0.90                   | 0.20           | <.0001         | 0.54                    | 0.10           | <.0001         |
| Marriage Patterns         | -0.67                   | 0.21           | 0.0014         | -0.01                   | 0.14           | 0.9358         |
| Mathematical Dem          | -1.53                   | 0.49           | 0.0019         | -1.10                   | 0.23           | <.0001         |
| Migration                 | 0.11                    | 0.10           | 0.2630         | -0.46                   | 0.11           | <.0001         |
| Mortality transition      | -1.18                   | 0.19           | <.0001         | -1.52                   | 0.23           | <.0001         |
| Number of children        | -0.22                   | 0.12           | 0.0605         | 0.08                    | 0.10           | 0.3982         |
| Occupational Mobility     | -1.46                   | 0.48           | 0.0022         | 0.46                    | 0.16           | 0.0047         |
| Political demography      | 0.24                    | 0.17           | 0.1558         | 0.09                    | 0.19           | 0.6405         |
| Population Growth         | 0.13                    | 0.10           | 0.2052         | -0.77                   | 0.12           | <.0001         |
| Population Policy         | -0.34                   | 0.18           | 0.0624         | 0.03                    | 0.14           | 0.8073         |
| Racial Segregation        | -0.95                   | 0.13           | <.0001         | 0.55                    | 0.09           | <.0001         |
| Same-sex Families         | -0.32                   | 0.20           | 0.1118         | 0.01                    | 0.19           | 0.9568         |
| Sex Ratio                 | -0.49                   | 0.19           | 0.0098         | 0.06                    | 0.11           | 0.5739         |
| Social Security           | 0.13                    | 0.41           | 0.7469         | -0.33                   | 0.46           | 0.4766         |
| Status of women           | -0.06                   | 0.22           | 0.7896         | -0.48                   | 0.20           | 0.0179         |
| Women's Labor Force       | 0.39                    | 0.10           | <.0001         | -0.14                   | 0.11           | 0.1977         |
| Immigration               | Omitted                 |                |                |                         |                |                |
| <i>Demography</i>         | -50.48                  | 5.78           | <.0001         | 26.11                   | 4.64           | <.0001         |
| <i>PDR</i>                | -9.02                   | 6.97           | 0.1958         | 3.19                    | 6.37           | 0.6158         |
| <i>Population Studies</i> | Omitted                 |                |                |                         |                |                |
| <i>year*Demography</i>    | 0.03                    | 0.00           | <.0001         | -0.01                   | 0.00           | <.0001         |
| <i>year*PDR</i>           | 0.00                    | 0.00           | 0.1807         | 0.00                    | 0.00           | 0.6431         |
| N References              | -0.01                   | 0.00           | <.0001         | 0.00                    | 0.00           | 0.3473         |
| Prop Cites to demography  | -4.06                   | 0.15           | <.0001         | -1.29                   | 0.07           | <.0001         |
| AIC/BIC                   | -6218.41 / -5929.87     |                |                | -4083.55 / -3795.01     |                |                |

Note: GLM fit via maximum likelihood and logit link. Used for Figures 6 and S7.  
*PDR* = *Population and Development Review*

Table S3. Coefficients estimated from negative binomial model of citation counts

| Parameter                    | Estimate | Std Err  | P-value |
|------------------------------|----------|----------|---------|
| Intercept                    | -8414.62 | 426.8630 | <.0001  |
| Abortion                     | 0.2932   | 0.1690   | 0.0829  |
| Africa                       | 0.7556   | 0.1634   | <.0001  |
| Birth Intervals              | 0.1883   | 0.1457   | 0.1964  |
| Birth Spacing                | 0.6602   | 0.1561   | <.0001  |
| Child Mortality              | 1.0659   | 0.1437   | <.0001  |
| Child Well-being             | 1.1506   | 0.1005   | <.0001  |
| China                        | 0.4986   | 0.1476   | 0.0007  |
| Dem Transition               | 0.7694   | 0.0824   | <.0001  |
| Divorce                      | 0.9193   | 0.1149   | <.0001  |
| Education                    | 1.2480   | 0.1111   | <.0001  |
| Family Planning              | 0.1493   | 0.0911   | 0.1013  |
| Fecundability                | 0.8198   | 0.1436   | <.0001  |
| HH & living arrangements     | 0.6204   | 0.1082   | <.0001  |
| HIV/AIDS                     | 1.0366   | 0.1422   | <.0001  |
| Health & Aging               | 0.8831   | 0.1096   | <.0001  |
| Income & Poverty             | 0.5516   | 0.1261   | <.0001  |
| Infant Mortality             | 0.5662   | 0.1287   | <.0001  |
| Life Exp & Longevity         | 0.8817   | 0.0914   | <.0001  |
| Marriage & Cohabitation      | 1.1726   | 0.1058   | <.0001  |
| Marriage Patterns            | 0.8206   | 0.1343   | <.0001  |
| Mathematical Dem             | 0.2299   | 0.1249   | 0.0656  |
| Migration                    | 0.9936   | 0.0878   | <.0001  |
| Mortality transition         | 0.7119   | 0.1007   | <.0001  |
| Number of children           | 0.6610   | 0.0883   | <.0001  |
| Occupational Mobility        | 0.8603   | 0.2062   | <.0001  |
| Political demography         | -0.2865  | 0.1935   | 0.1386  |
| Population Growth            | 0.1164   | 0.0896   | 0.1937  |
| Population Policy            | -0.1872  | 0.1316   | 0.1551  |
| Racial Segregation           | 1.0439   | 0.0981   | <.0001  |
| Same-sex Families            | 0.8447   | 0.2079   | <.0001  |
| Sex Ratio                    | 0.9642   | 0.1096   | <.0001  |
| Social Security              | 0.3171   | 0.4689   | 0.4989  |
| Status of women              | 0.8836   | 0.1701   | <.0001  |
| Women's Labor Force          | 0.5624   | 0.1041   | <.0001  |
| Immigration                  | 0.7550   | 0.1099   | <.0001  |
| Dem Tech                     | Omitted  |          |         |
| year                         | 8.4735   | 0.4293   | <.0001  |
| year*year                    | -0.0021  | 0.0001   | <.0001  |
| <i>Demography</i>            | -3081.66 | 560.0233 | <.0001  |
| <i>PDR</i>                   | -35.0837 | 7.0287   | <.0001  |
| <i>Population Studies</i>    | Omitted  |          |         |
| year* <i>Demography</i>      | 3.0825   | 0.5629   | <.0001  |
| year* <i>PDR</i>             | 0.0178   | 0.0035   | <.0001  |
| year*year* <i>Demography</i> | -0.0008  | 0.0001   | <.0001  |
| Dispersion                   | 1.2584   | 0.0223   |         |

Note: Used for Figure 7. *PDR* = *Population and Development Review*

Figure S1. Example paper similarity network surrounding “Increases in marital status differences...”

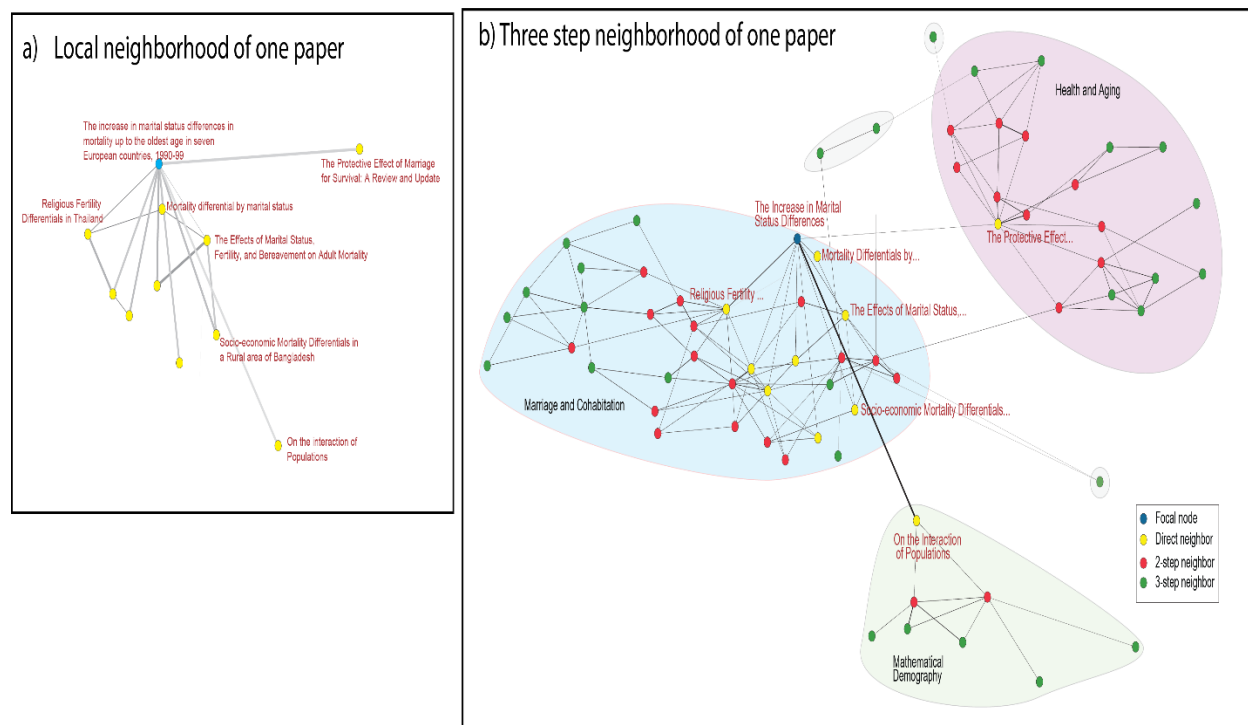

Panel A of Figure S1 represents the paper similarity network when we walk out from the focal paper titled “The increase in marital status differences in mortality up to the oldest age in seven European countries, 1990-99” (Murphy, Grundy and Kalogirou 2007) to the local network neighborhood. This paper investigates mortality differentials by marital status among older age groups. It is adjacent to 10 informatically similar papers, most of them on the relationship between mortality and marital status, with the bottom paper in this network being Nathan Keyfitz’s “On the interactions of populations” (Keyfitz 1965) which focuses on the formal demography of the dynamic interactions of population groups by age, sex and marital status.

Stepping out two more links as shown in panel B, we present a couple of dozen other papers that form the three-step neighborhood of the focal paper. As similar papers are pulled together by the graph layout algorithm, we see clusters emerge in the network diagram as papers are pulled into these clusters. So, for example, Keyfitz’s paper is pulled into a cluster with other similar papers on the formal demography of the dynamics of population change. These clusters are indicated by shaded areas and labeled based on the most commonly used terms and our knowledge of the field. The topic cluster on the left is labeled “Marriage and Cohabitation,” the one on the right “Health and Aging,” and the one at the bottom “Mathematical Demography.” Our cluster procedure places nodes in the network (i.e., papers) either within or between clusters. The three nodes in gray are interstitial papers bridging multiple clusters.

Figure S2: Percent distribution of papers by topic cluster

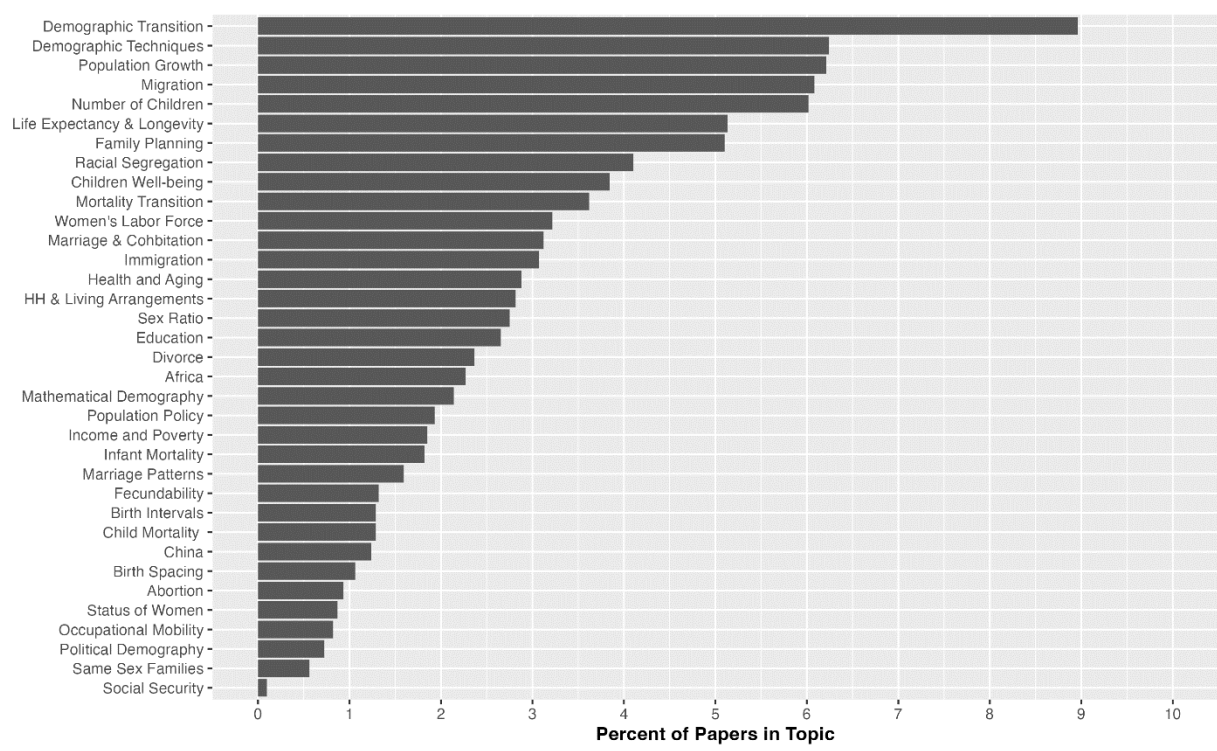

Figure S3: A visualization of the growing volume of articles published in *Demography*, *Population and Development Review*, and *Population Studies* scattered across the intellectual landscape represented in Figure 1

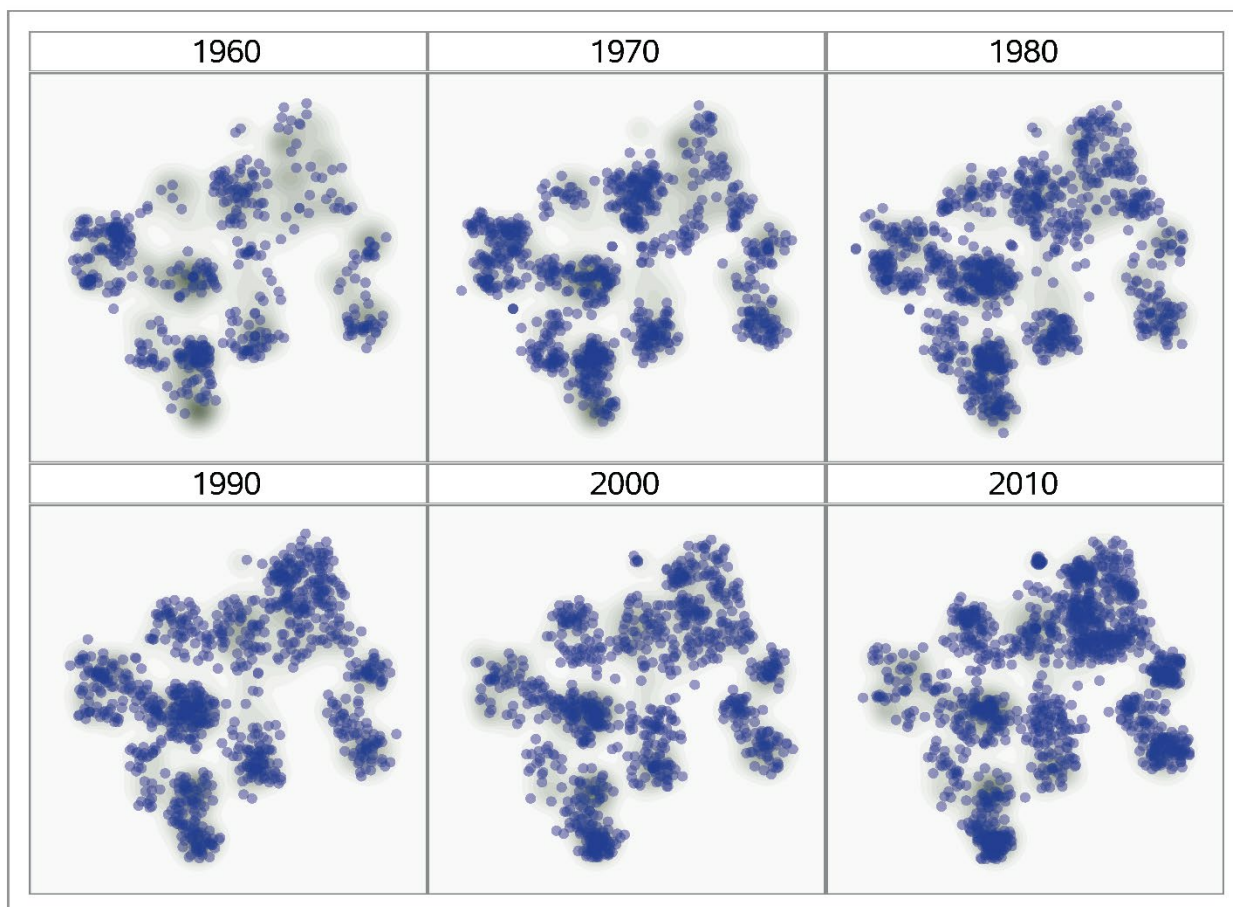

Figure S4. Counts of papers on demography core topics and on social and behavioral demography topics and their ratios, by decade and journal

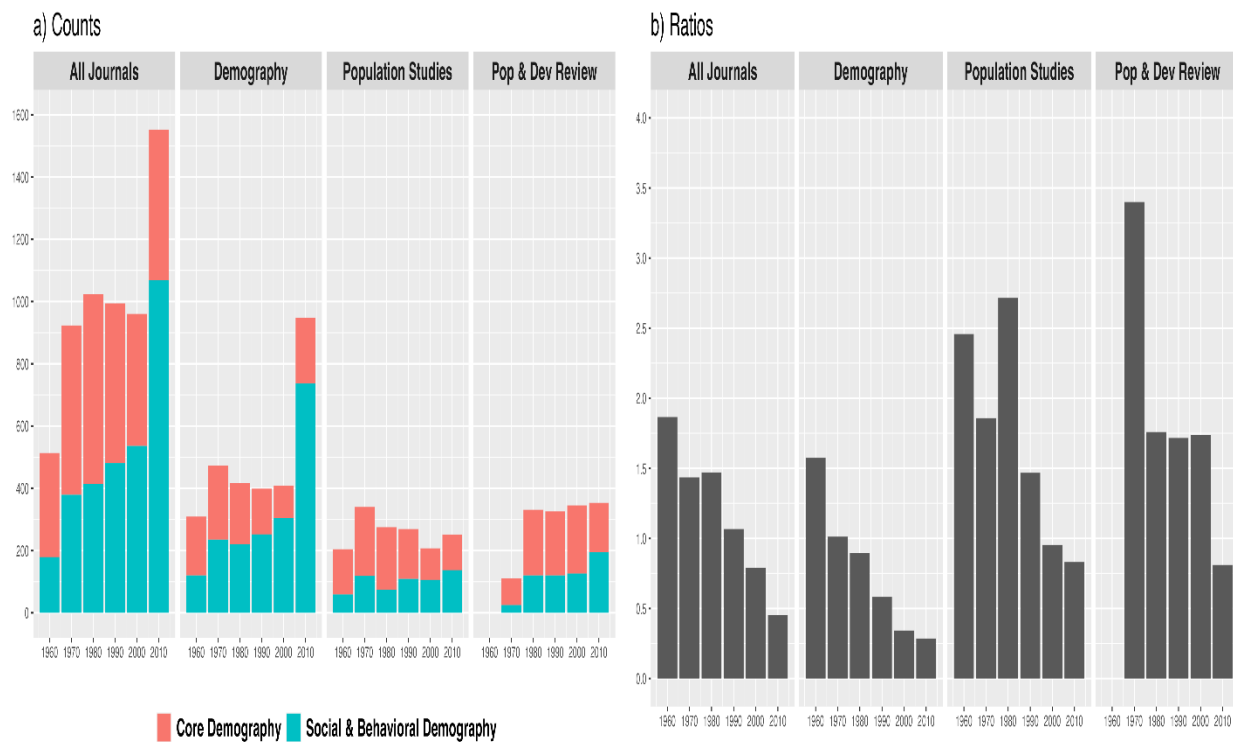

Figure S5: Disciplinary Heterogeneity over Time, 1957-2020

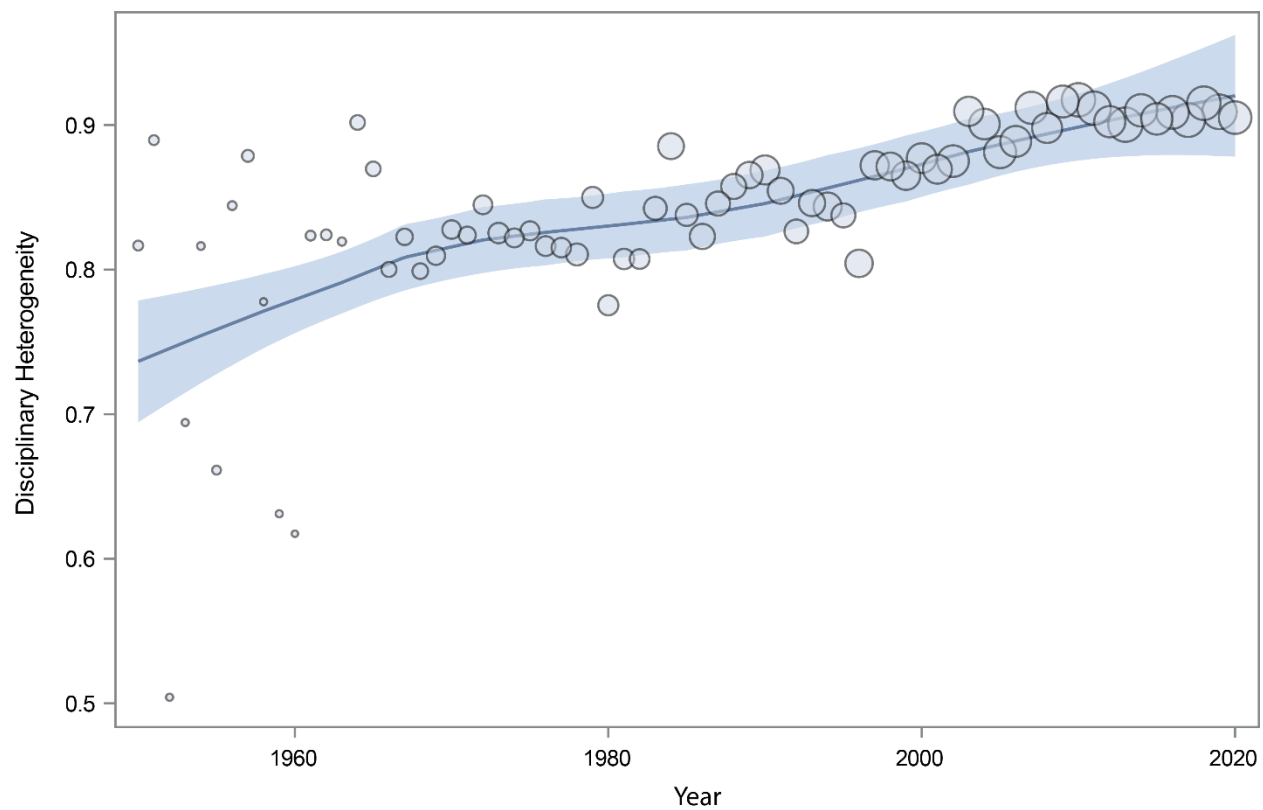



Figure S6. Counts of references cited by papers in *Demography*, *Population and Development Review*, and *Population Studies*, by Web of Science subject category and decade

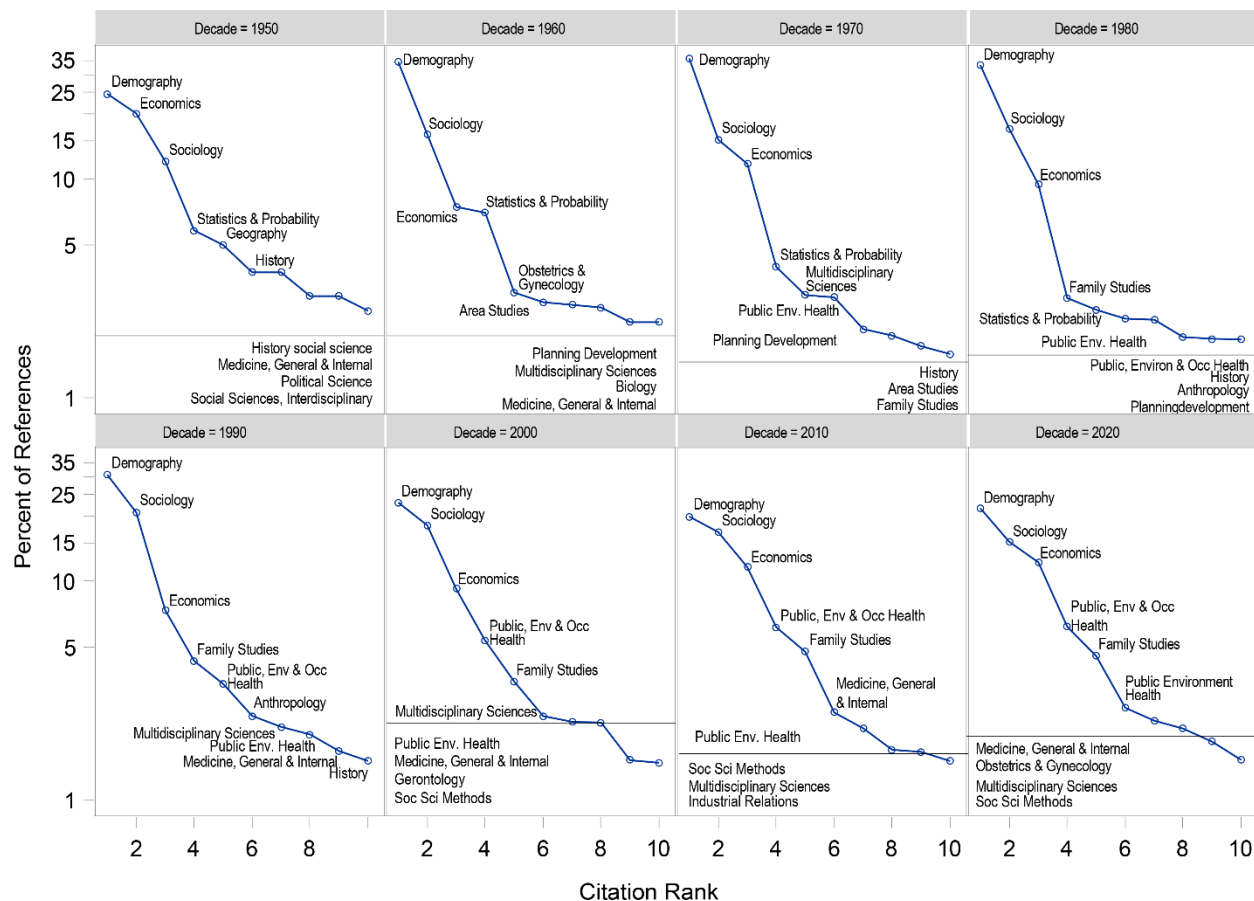

Figure S7. Predicted proportions of a paper's references to sociology and economic journals from logit models of citation patterns

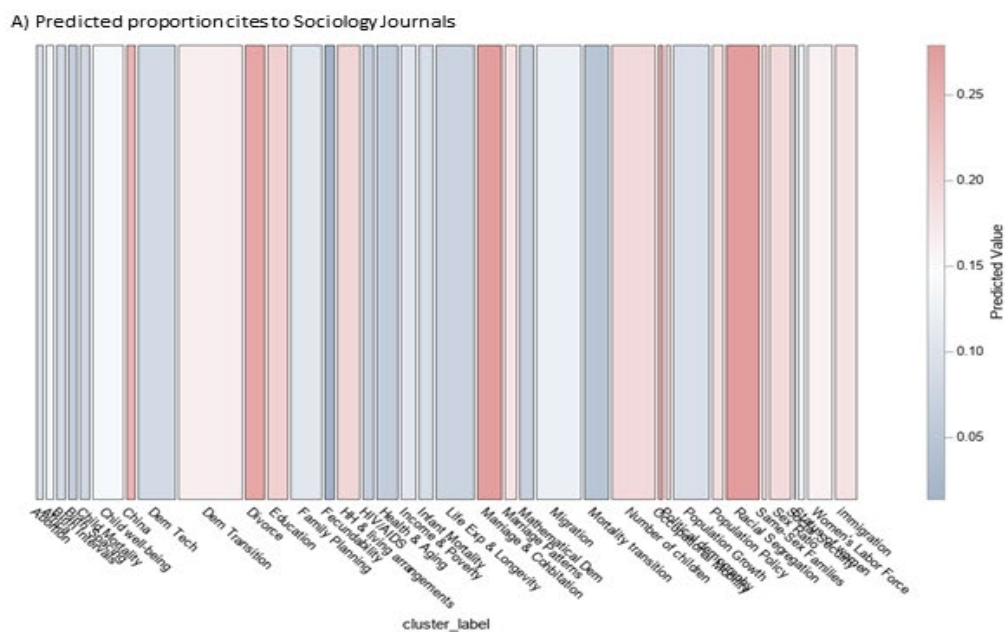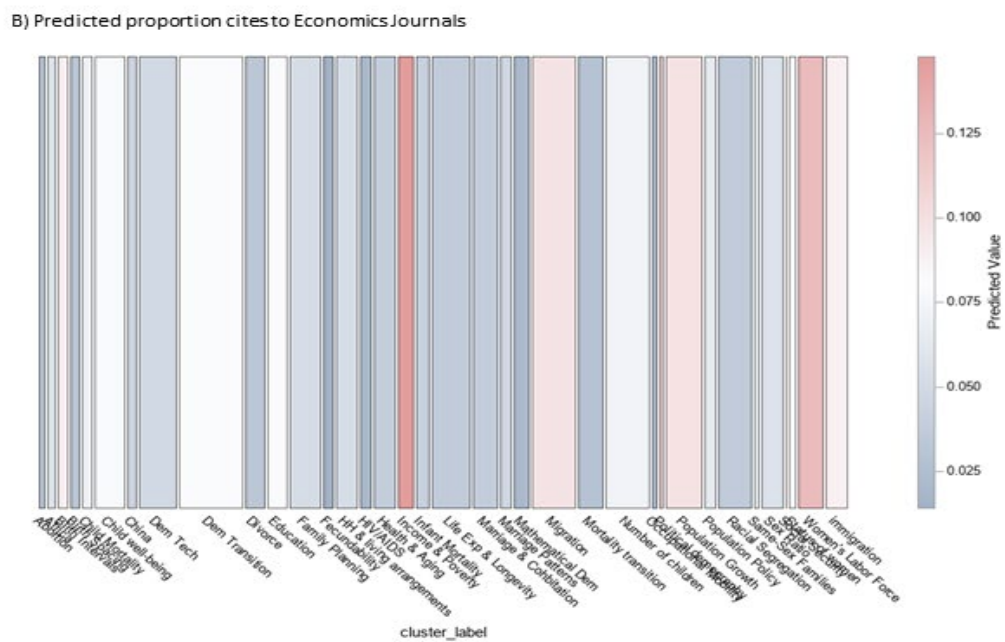

Figure S8. Top 20 journal and journal subject categories in which contemporary core demographers published papers with COVID-19 in the title and papers with Life Expectancy, Longevity or Life Span in the title.

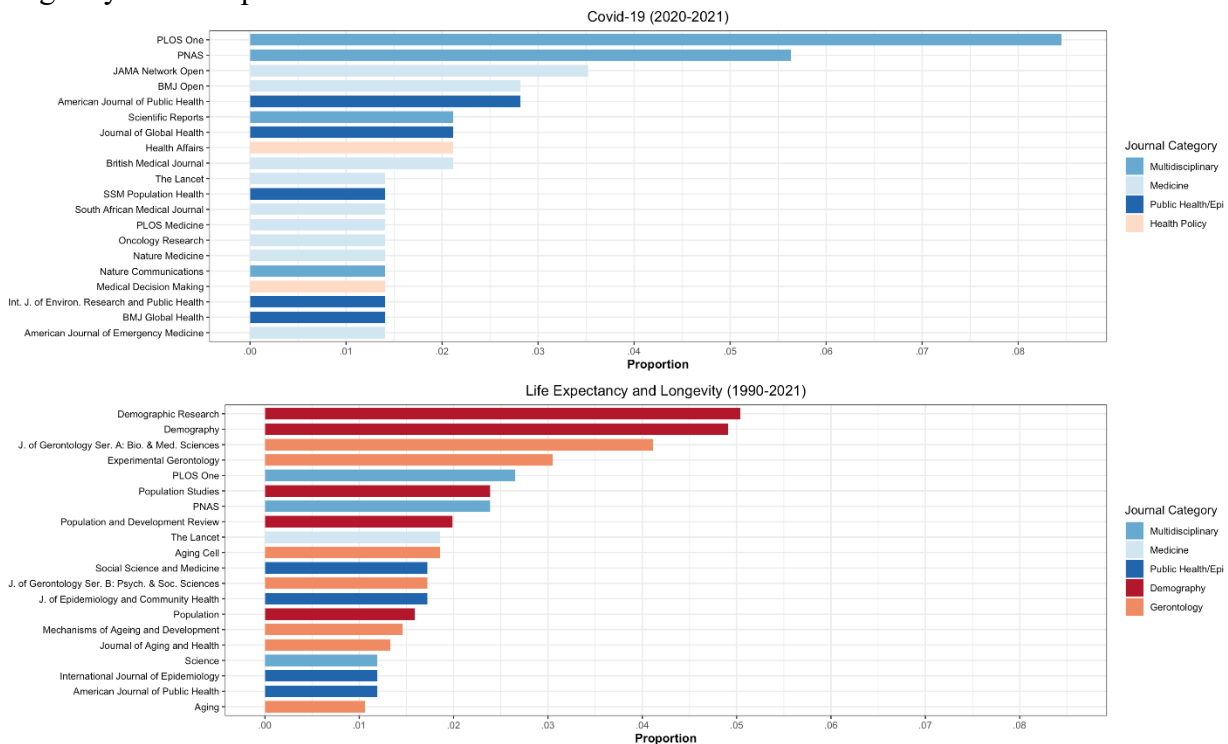

COVID-19 N for 2020-2021=140; Life Expectancy and Longevity N for 1990-2021 = 754.

## References to Online Supplement

Keyfitz, Nathan (1965). On the interaction of populations. *Demography*, 2 (1): 276–288.

Murphy, Michael, Emily Grundy and Stamatis Kalogirou (2007). The increase in marital status differences in mortality up to the oldest age in seven European countries, 1990–99. *Population Studies*, 61:3, 287-298.
